# Supplementary material
Source: publisher site journal article supplement (https://www.dovepress.com/article/516531)

**Figure S1** Nomogram for predicting the probability of CAD in Validation cohort.
A. Model 1, The risk prediction model was constructed based on HAR.
B. Model 2: The risk prediction model was built based on age, hypertension, diabetes, smoking, and WBC.
C. Model 3: The risk prediction model was established based on HAR combined with age, hypertension, diabetes, smoking, and WBC.


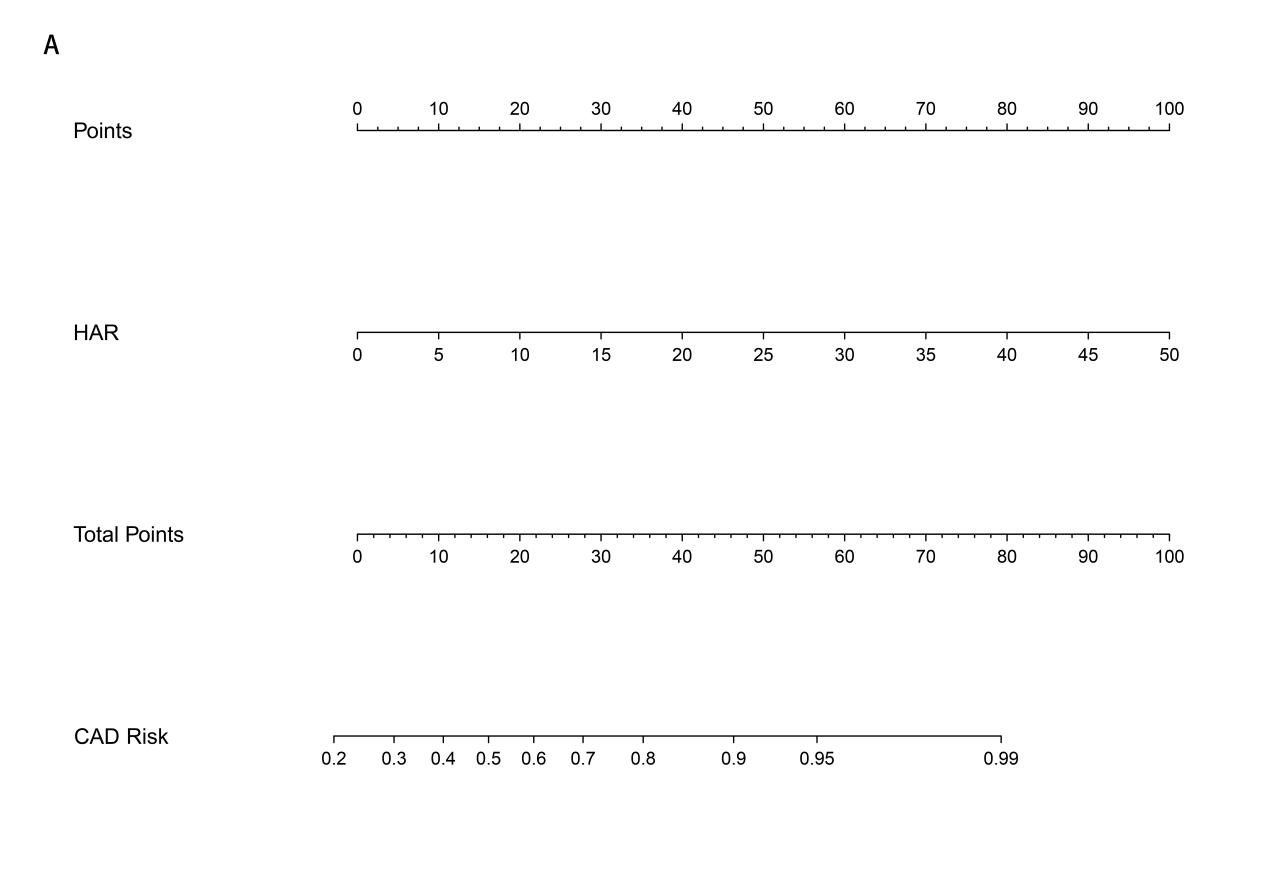


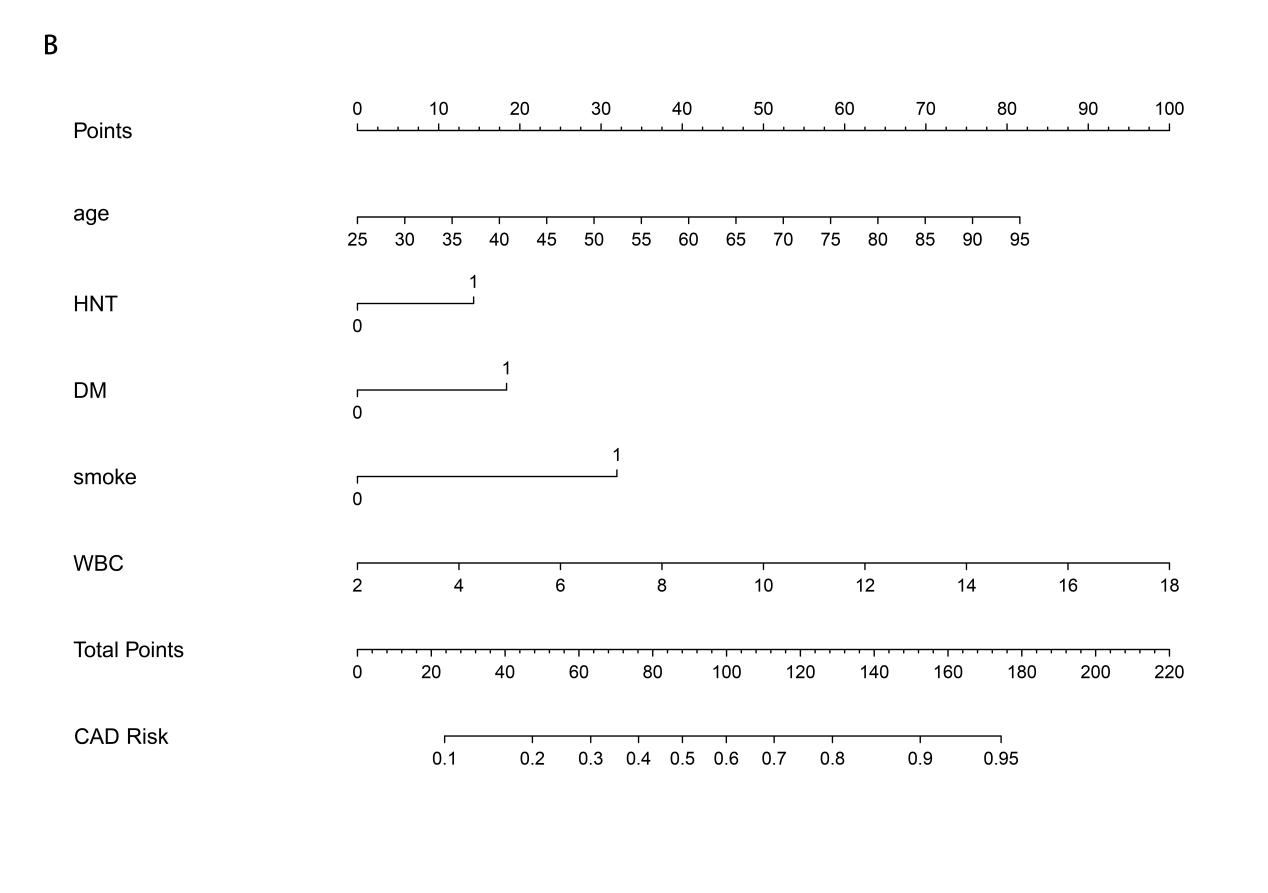





**Figure S2** Calibration curve for predicting the probability nomogram of CAD in Validation cohort.
A. Model 1 Calibration Curve;
B. Model 2 Calibration Curve;
C. Model 3 Calibration Curve.


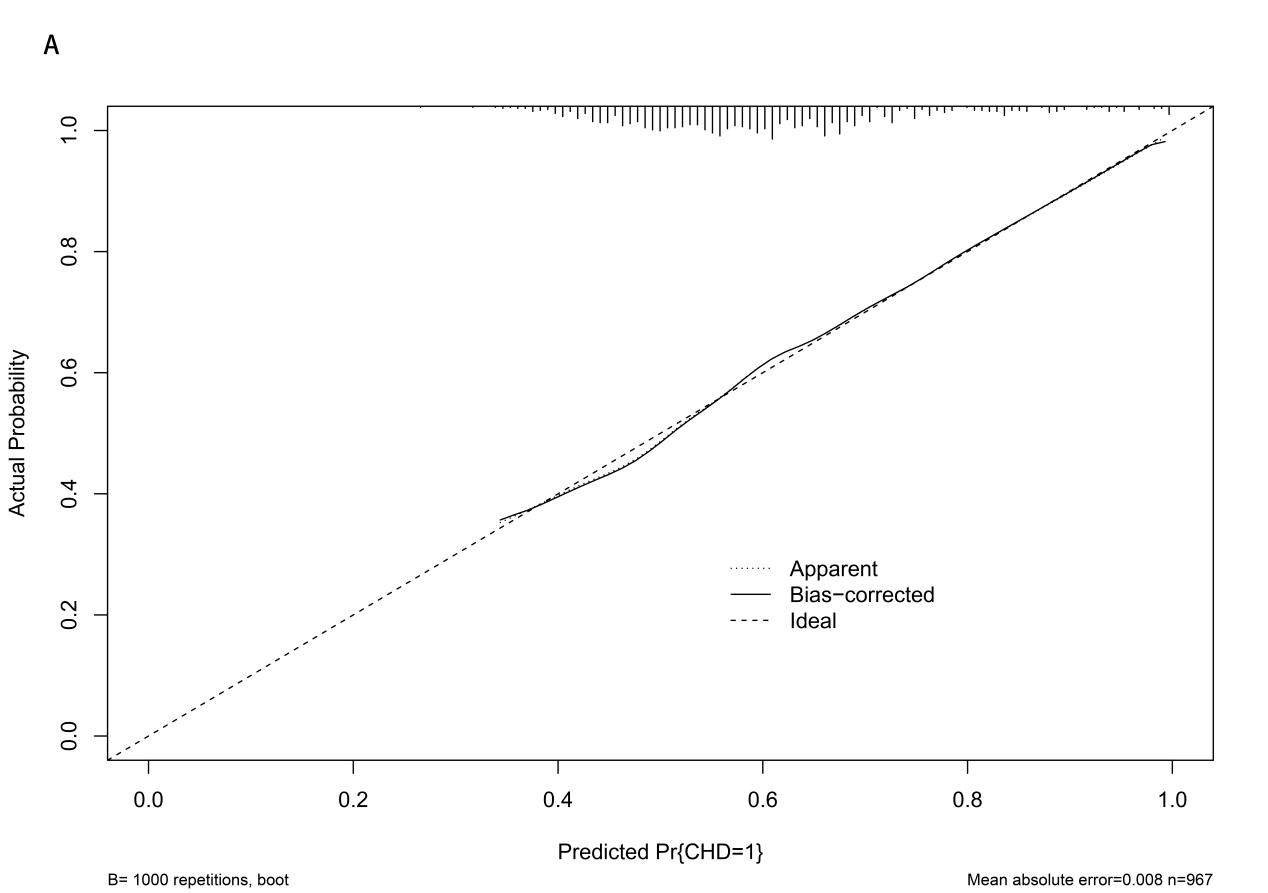


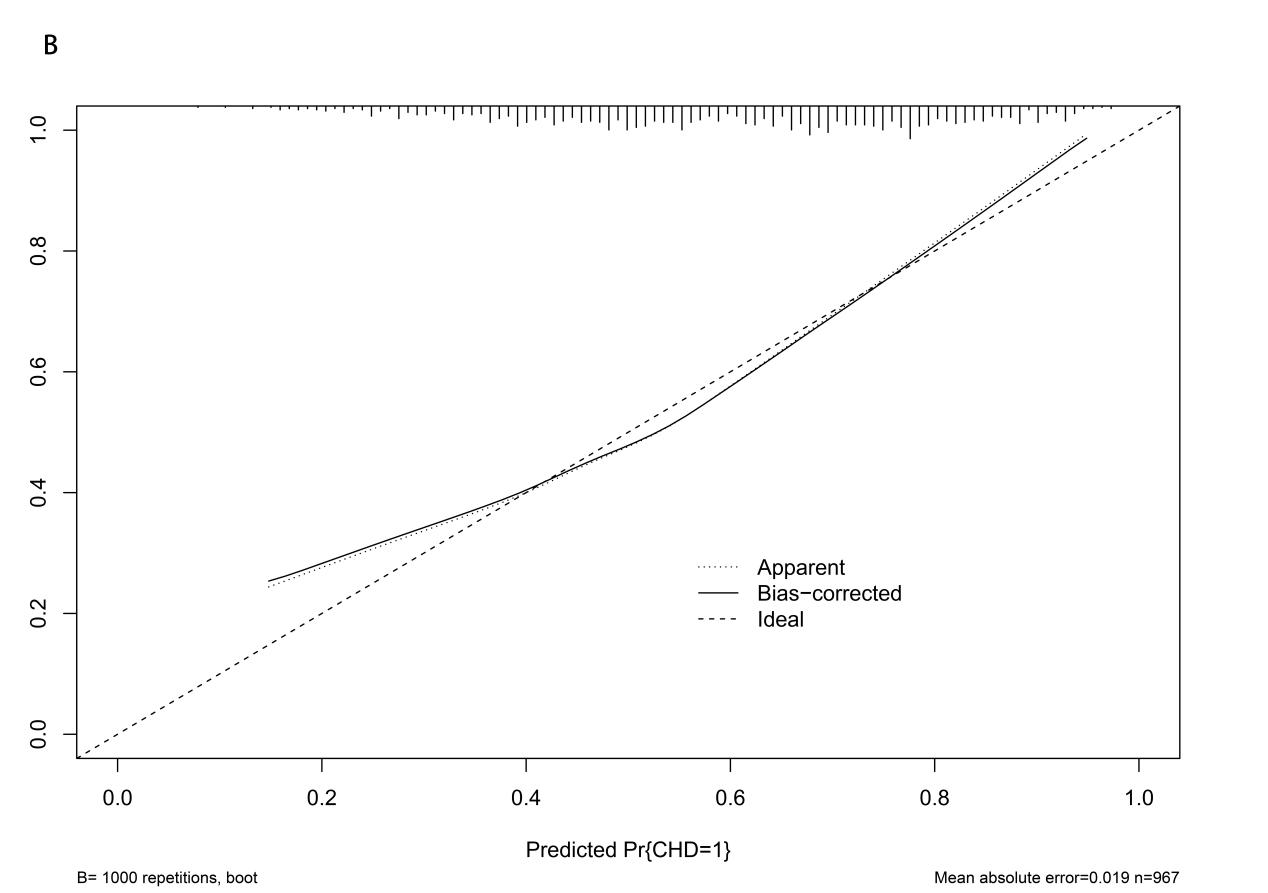


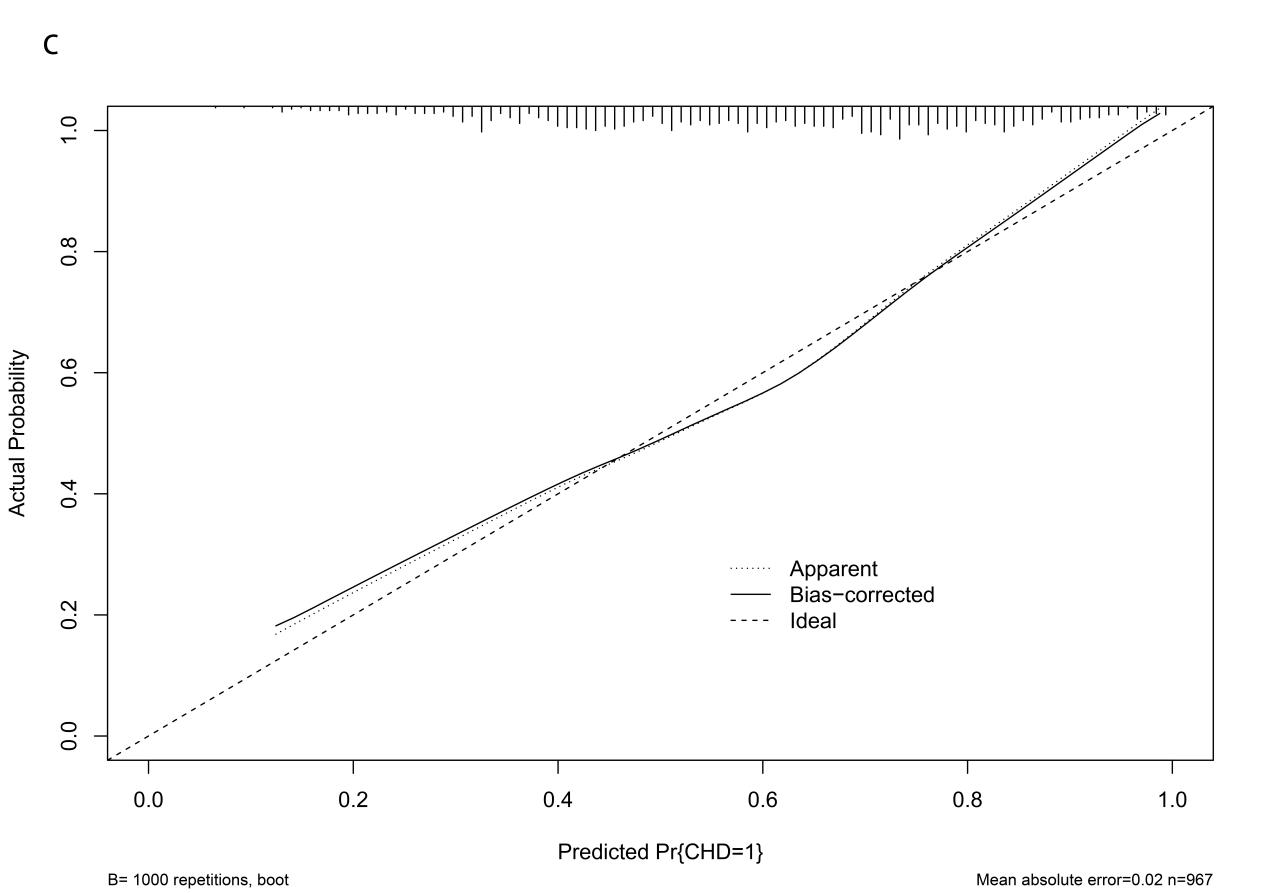


**Figure S3** Nomogram for predicting the probability of Severe CAD in Validation cohort.
A. Model 1, The risk prediction model was constructed based on HAR.
B. Model 2: The risk prediction model was built based on age and WBC.
C. Model 3: The risk prediction model was established based on HAR combined with age and WBC.





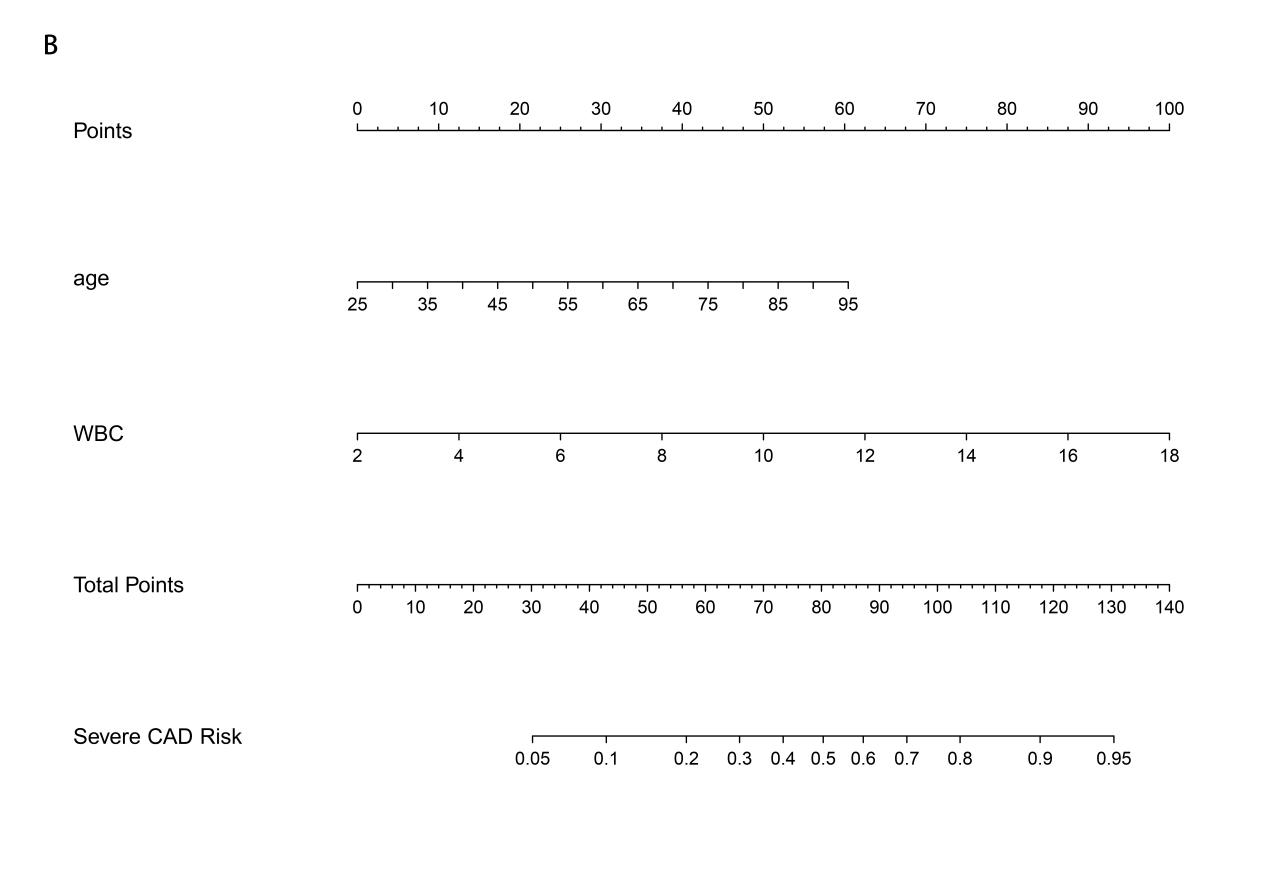


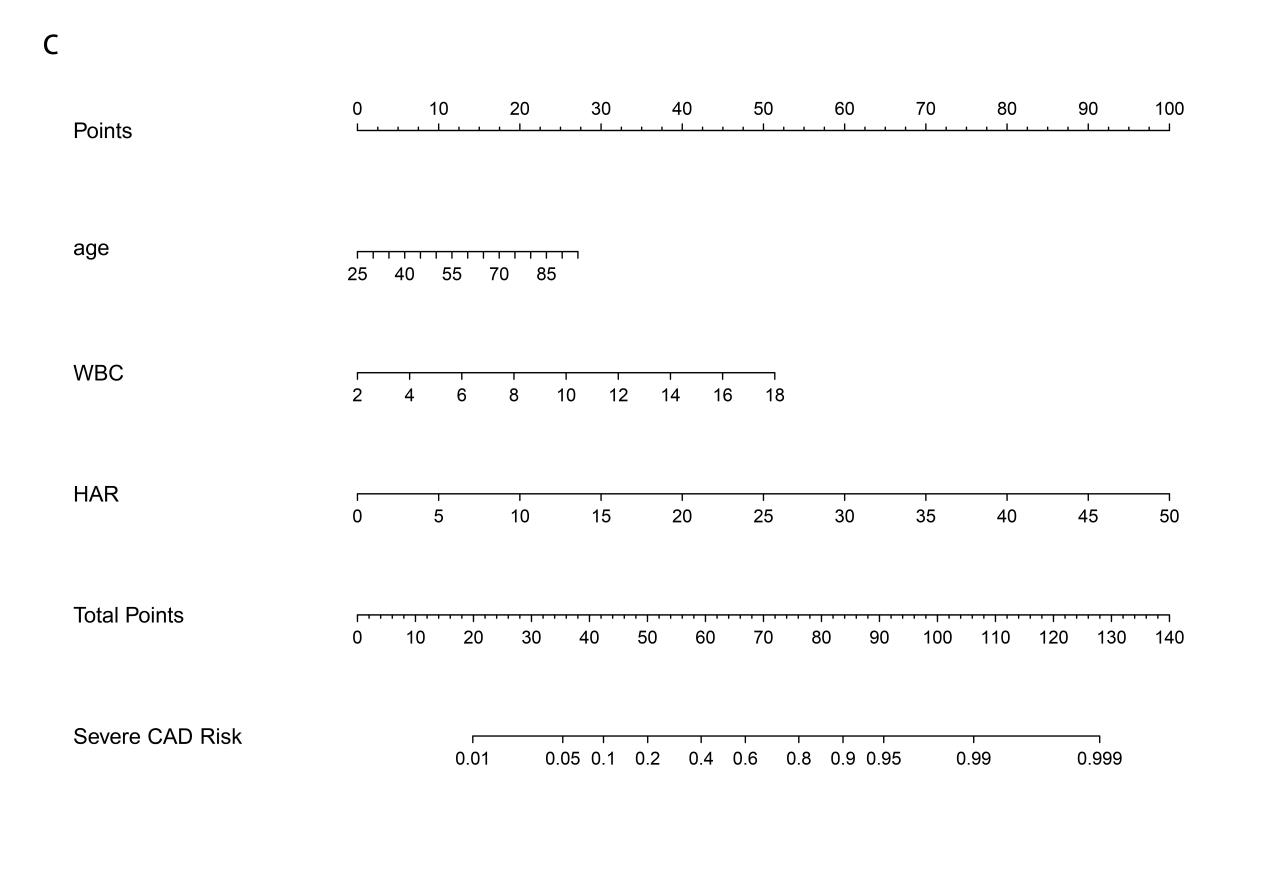


**Figure S4** Calibration curve for predicting the probability nomogram of Severe CAD in Validation cohort.
A. Model 1 Calibration Curve;
B. Model 2 Calibration Curve;
C. Model 3 Calibration Curve.


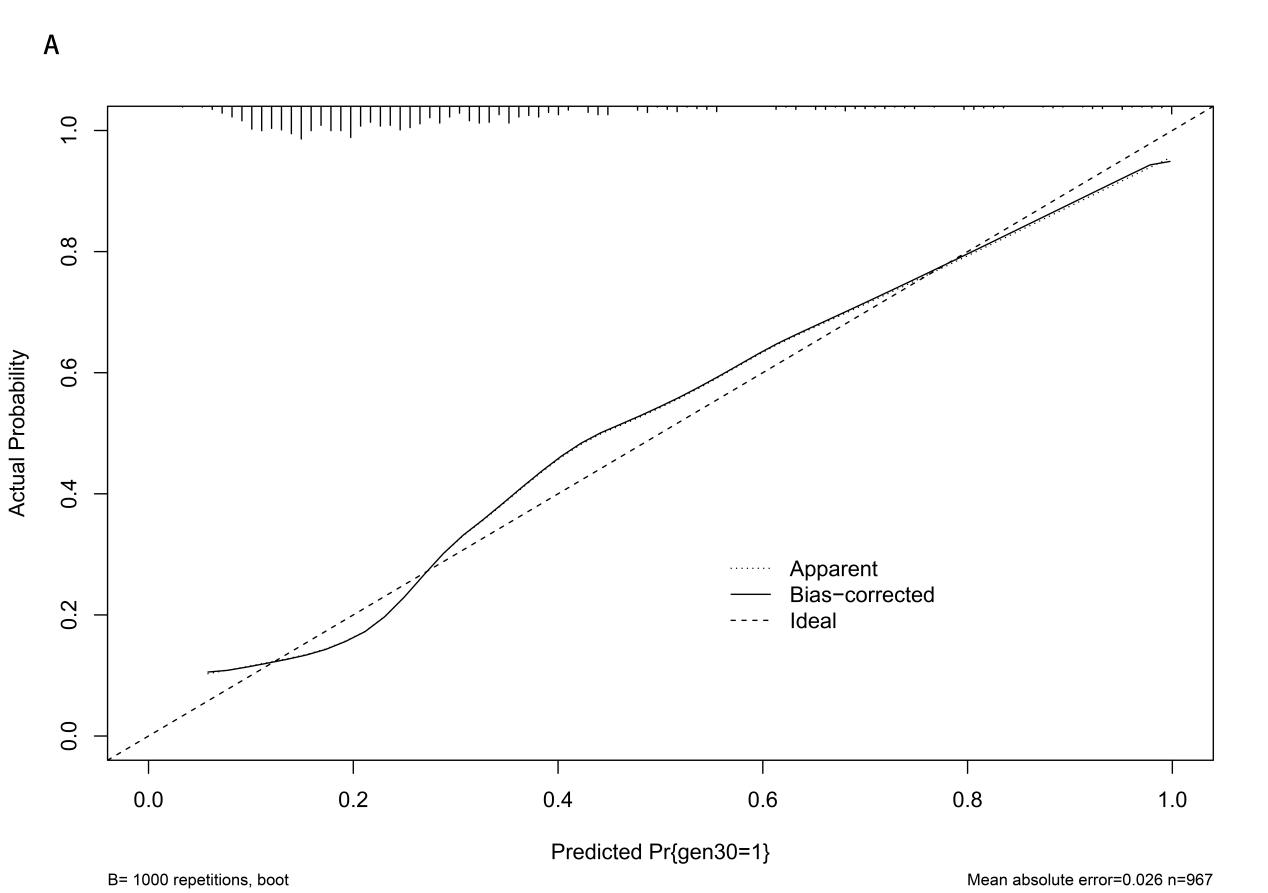


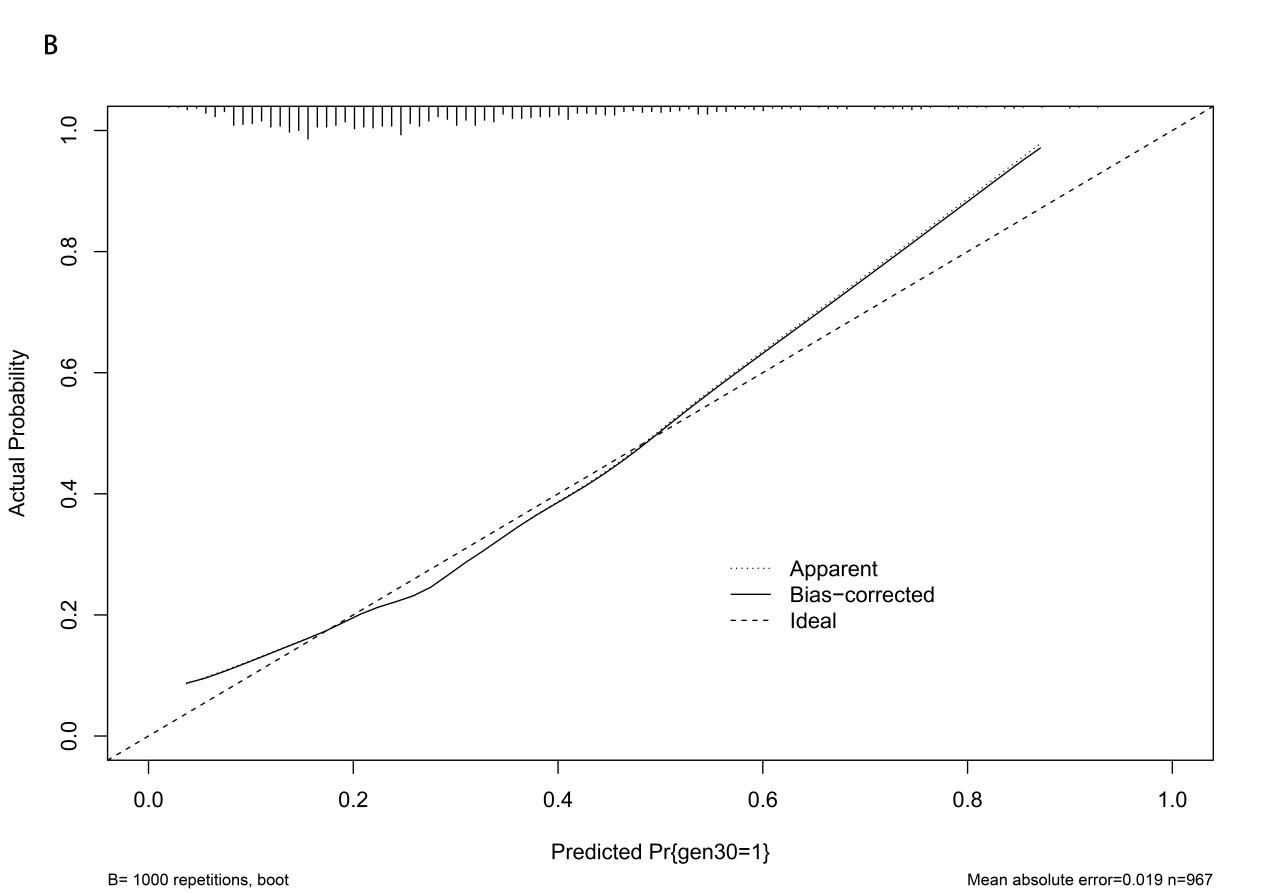


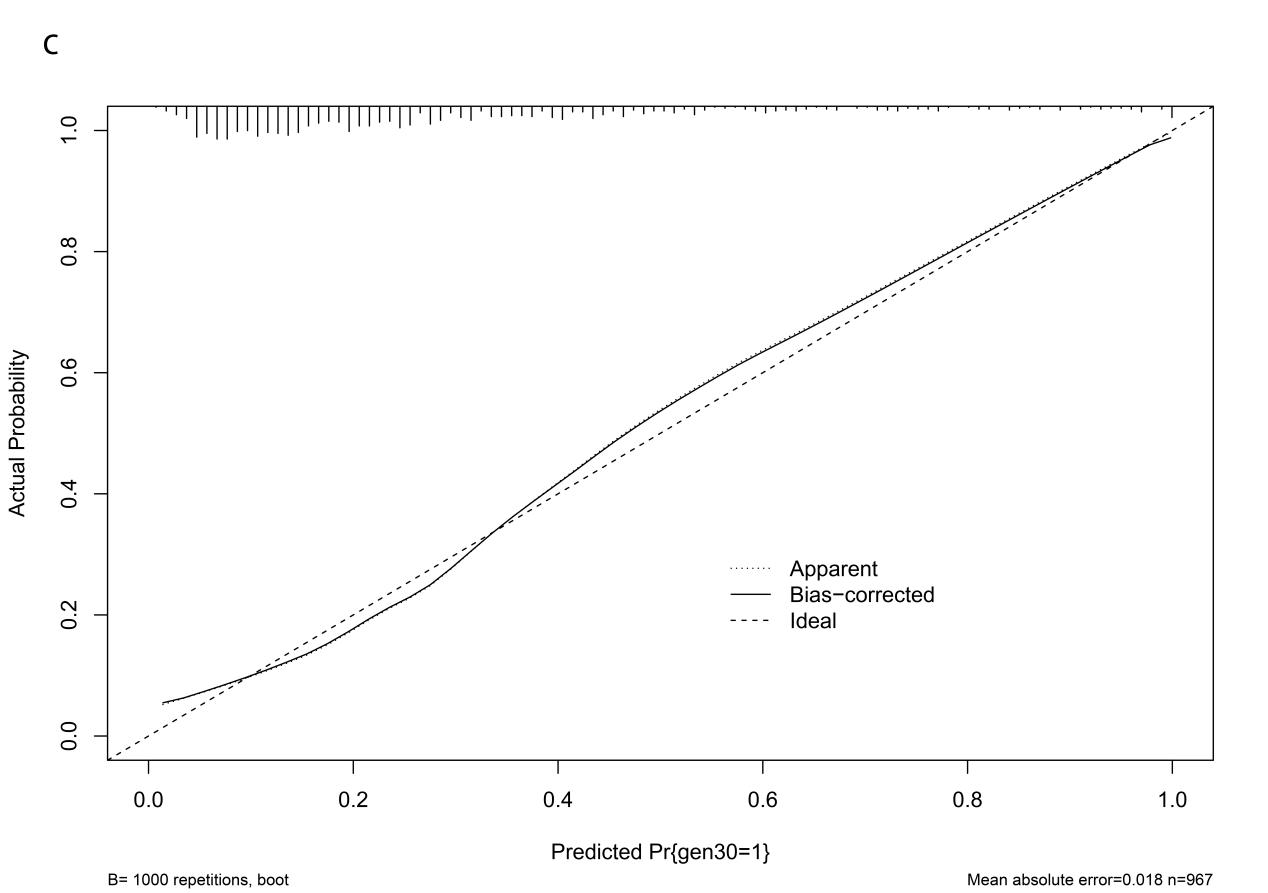


**Figure S5** Correlation Analysis of HAR and Gensini Score in Validation cohort


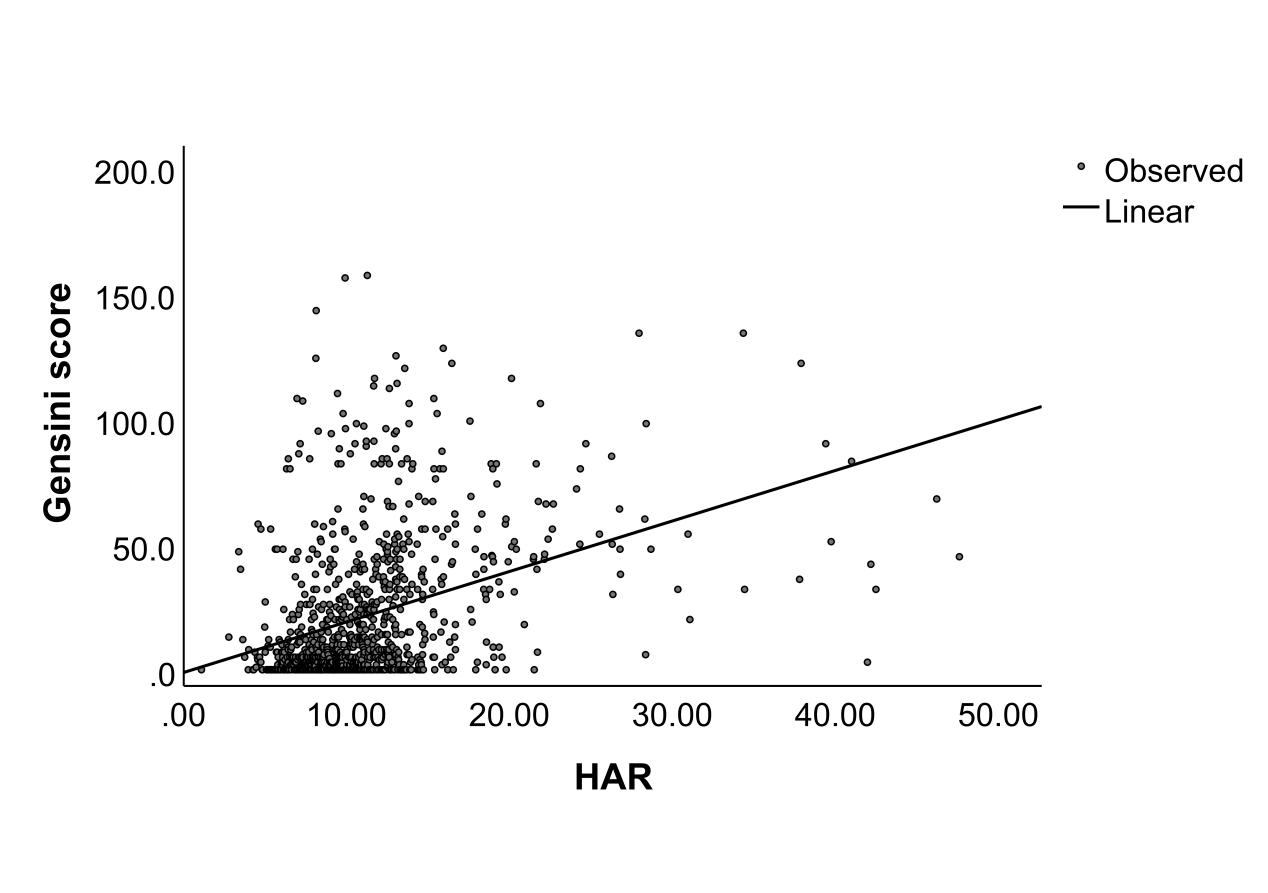


**Figure S6** DCA curve analysis of the prediction model for severe coronary artery disease in Validation cohort.


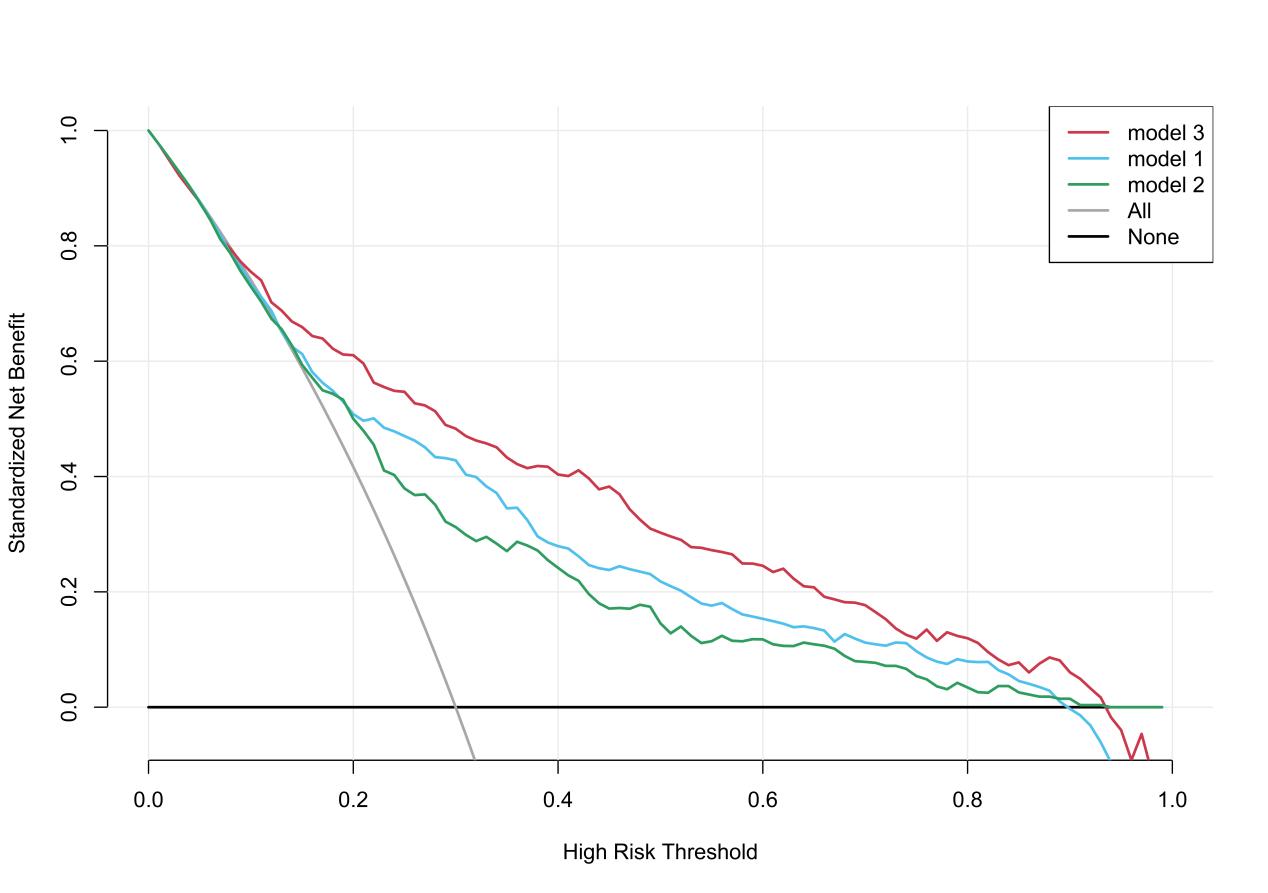


**Figure S7** Decision Curve Analysis of HAR and other parameters in Validation cohort.


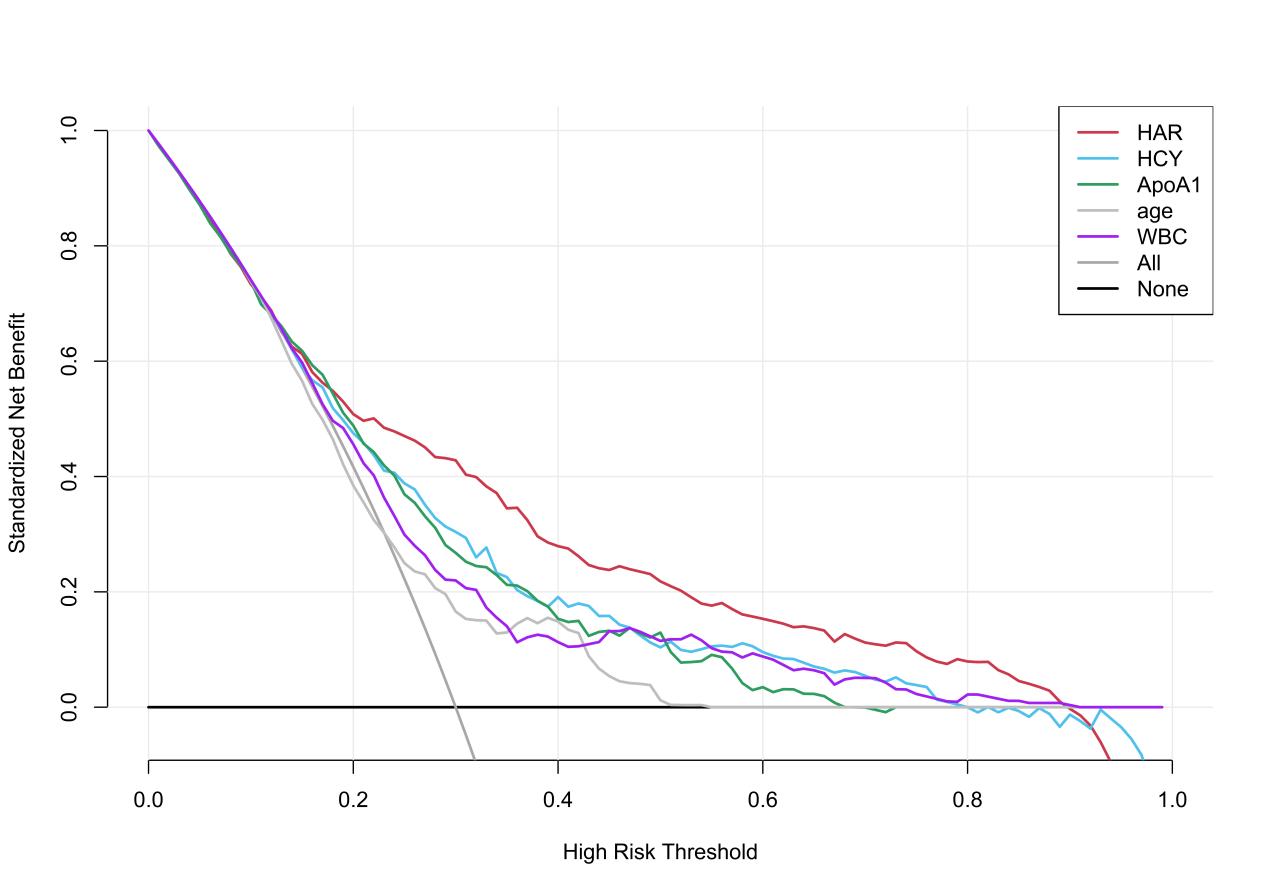

Supplement: Supplementary file 1 [file 516531%20Revised%20Figure%20S1-S7.docx]
